# Supplementary material
Source: MDPI journal article supplement (https://www.mdpi.com/2077-0472/11/1/28)
Supplement: s1 [file s1]

## Supplementary Information

# Development of a group-adapted housing system for pregnant sows: a field study on performance and welfare aspects

Eva Angermann, Camille M. C. Raoult, Monika Wensch-Dorendorf, Stephanie Frenking, Nicole Kemper and Eberhard von Borell

### Supplementary Materials

**Table S1.** Sorting of the SWOF sows to the low or high energy diet according to their parity and body weight (kg).

| Parity  | Body Weight Objective (kg) | Sorting to Feeding Area |                         |
|---------|----------------------------|-------------------------|-------------------------|
|         |                            | A—Low Energy Diet (kg)  | B—High Energy Diet (kg) |
| 1 and 2 | 270                        | > 280                   | < 260                   |
| 3 and 4 | 300                        | > 310                   | < 290                   |
| ≥ 5     | 325                        | > 335                   | < 315                   |

### Supplementary Results

#### *Body Weight*

**Table S2.** Effect of the parity class on focus sows' body weight (in kg as LSM ± SE) in the existing and SWOF systems.

| Parity Class* | Existing System          | SWOF System              |
|---------------|--------------------------|--------------------------|
| 1             | 302.4 ± 5.2              | 302.7 ± 6.3              |
| 2             | 306.8 <sup>b</sup> ± 5.2 | 291.0 <sup>a</sup> ± 5.9 |
| 3             | 317.5 ± 5.2              | 306.5 ± 6.0              |
| 4             | 316.1 <sup>b</sup> ± 3.3 | 285.5 <sup>a</sup> ± 4.9 |

\*Parity class 1 = second gestation; 2 = third gestation; 3 = fourth gestation; 4 = fifth to eleventh gestation  
LSM with different superscript letters within one line are significantly different with  $p < 0.05$

#### *Integument Injuries and Injury Index*

**Table S3.** Sows' injury index\* (LSM ± SE) during gestation.

| Day of Gestation | Injury Index              |
|------------------|---------------------------|
| 38               | 0.86 <sup>a</sup> ± 0.04  |
| 45               | 0.67 <sup>b</sup> ± 0.04  |
| 52               | 0.67 <sup>b</sup> ± 0.04  |
| 71               | 0.57 <sup>c</sup> ± 0.03  |
| 94               | 0.60 <sup>bc</sup> ± 0.04 |
| 109              | 0.45 <sup>d</sup> ± 0.04  |

\* Based on the observation of 679 injuries, rated between 0 and 3, from the 114 focus sows. LSM with different superscript letters within one column are significantly different with  $p < 0.05$

**Table S4.** Effect of the parity class on sows' injury index (LSM  $\pm$  SE) in the existing and SWOF systems.

| Parity Class | Injury Index                  |
|--------------|-------------------------------|
| 1            | 0.77 <sup>a</sup> $\pm$ 0.05  |
| 2            | 0.65 <sup>ab</sup> $\pm$ 0.05 |
| 3            | 0.57 <sup>b</sup> $\pm$ 0.06  |
| 4            | 0.56 <sup>b</sup> $\pm$ 0.04  |

\* Based on the observation of 679 injuries, rated between 0 and 3, from the 114 focus sows. LSM with different superscript letters within one column are significantly different with  $p < 0.05$

### Lameness

**Table S5.** Effect of the day of gestation on the percentage of lame sows (in %; back-transformed LSM  $\pm$  SE).

| Day of Gestation | Lame Sows (%)                 |
|------------------|-------------------------------|
| 31               | 4.96 <sup>b</sup> $\pm$ 2.14  |
| 38               | 21.64 <sup>a</sup> $\pm$ 4.75 |
| 45               | 5.80 <sup>b</sup> $\pm$ 2.44  |
| 52               | 6.58 <sup>b</sup> $\pm$ 2.49  |
| 71               | 5.78 <sup>b</sup> $\pm$ 2.46  |
| 94               | 9.76 <sup>b</sup> $\pm$ 3.19  |

\* Based on 680 observations from the 114 focus sows, rated as either non lame (score 0) or lame (score 1 or 2). Data are presented as back-transformed LSM and different superscript letters within one column are significantly different with  $p < 0.05$
